# Supplementary material for: Protein evidence of unannotated ORFs in Drosophila reveals diversity in the evolution and properties of young proteins
Source: eLife journal article supplement (doi:10.7554/elife.78772), 2022-09-27

fast-evolving

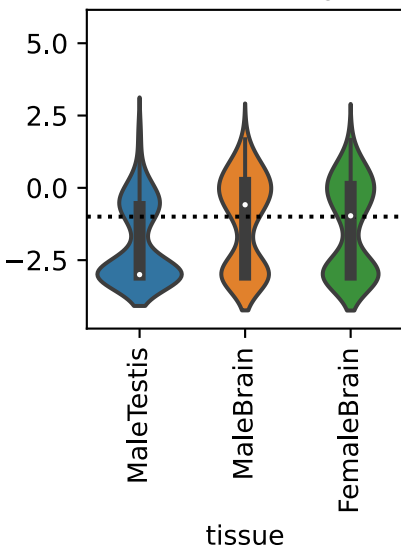

alt-frame

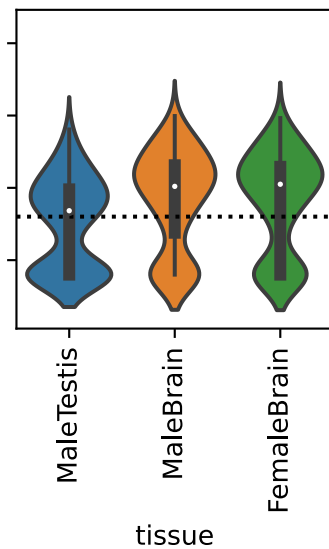

gen. unannot. ORFs

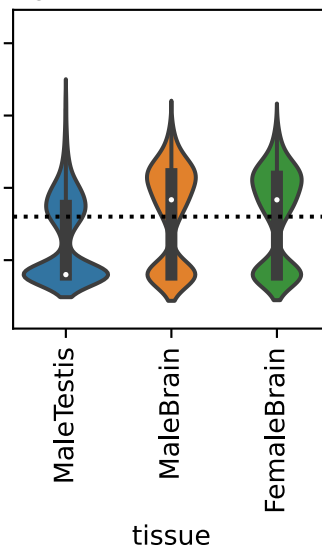

mel-specific

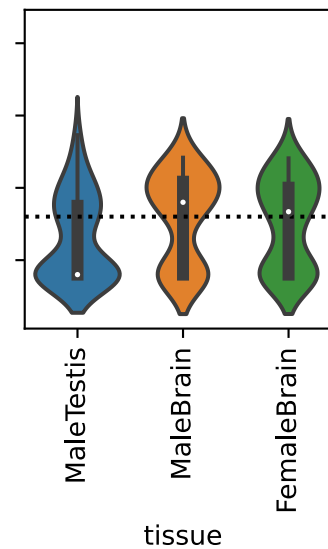

nonfunctional

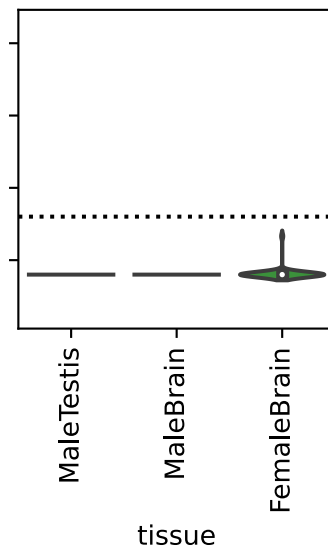

FlyBase named

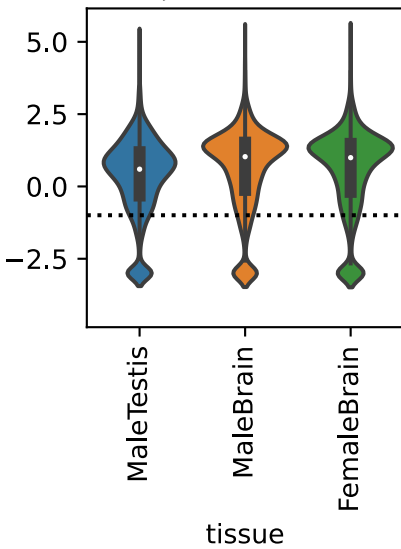

FlyBase CG

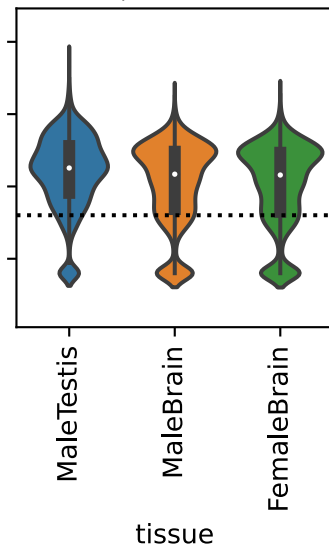

FlyBase CR

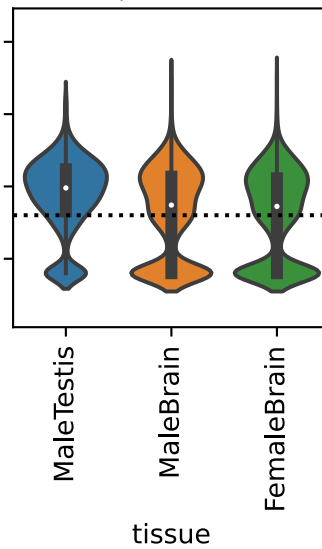

all utORFs

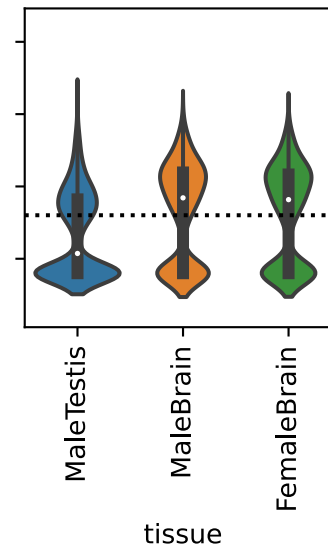

Supplement: supp [file elife-78772-supp-v1.zip]
