# Supplementary figures and images for: Protein evidence of unannotated ORFs in Drosophila reveals diversity in the evolution and properties of young proteins
Source: eLife journal article supplement (doi:10.7554/elife.78772), 2022-09-27

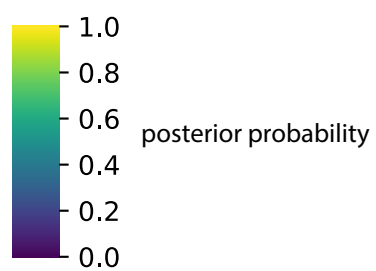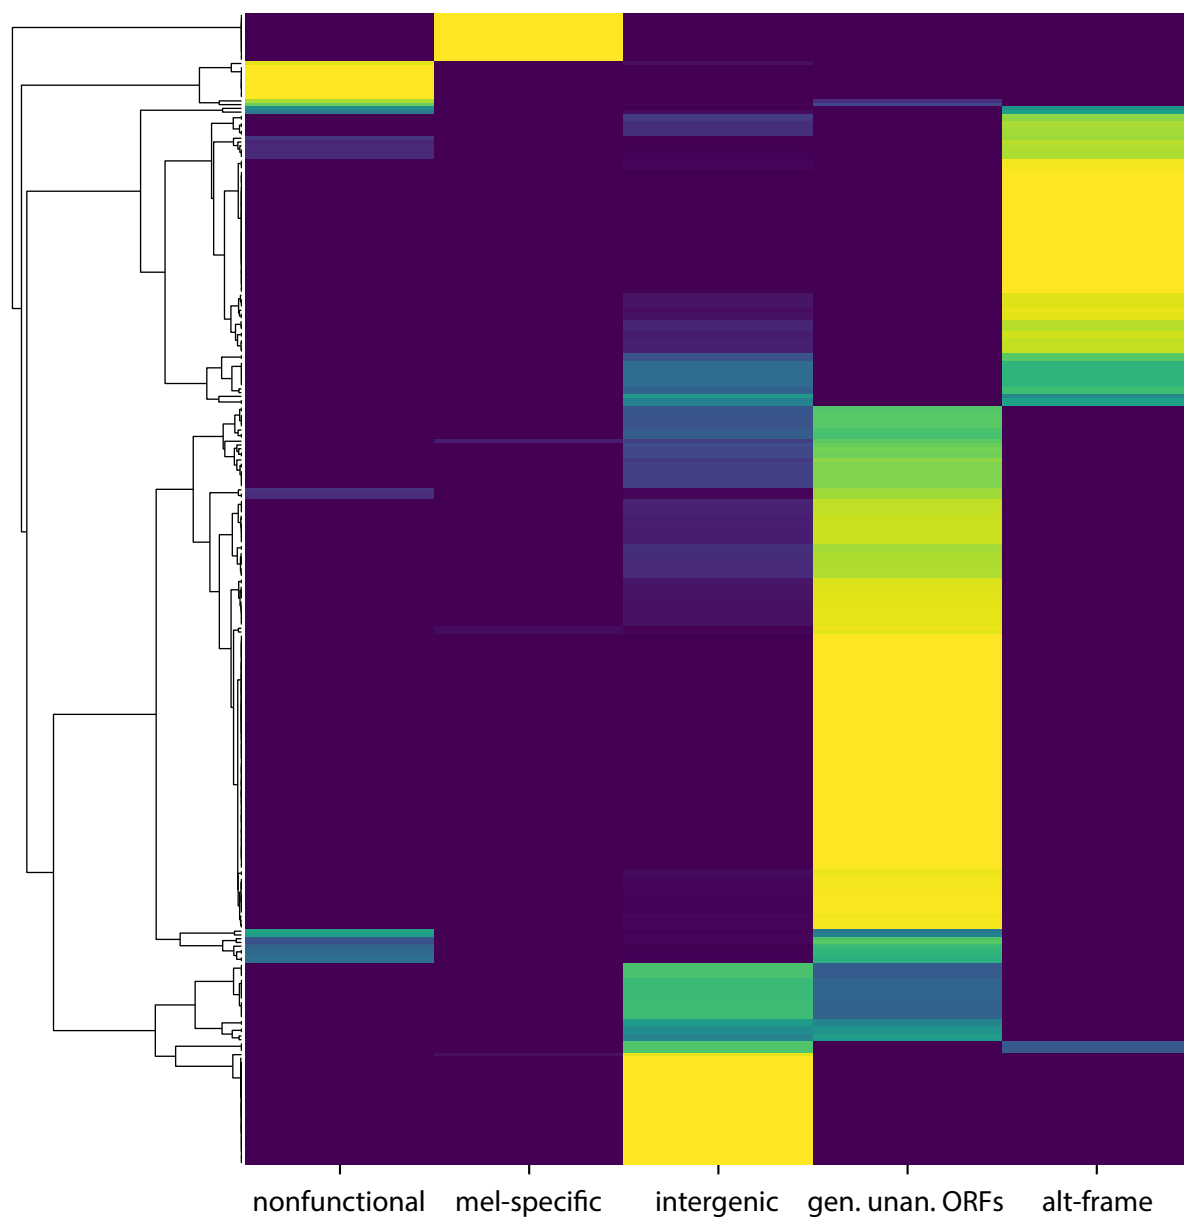

Supplement: supp [file elife-78772-supp-v1.zip]

**A**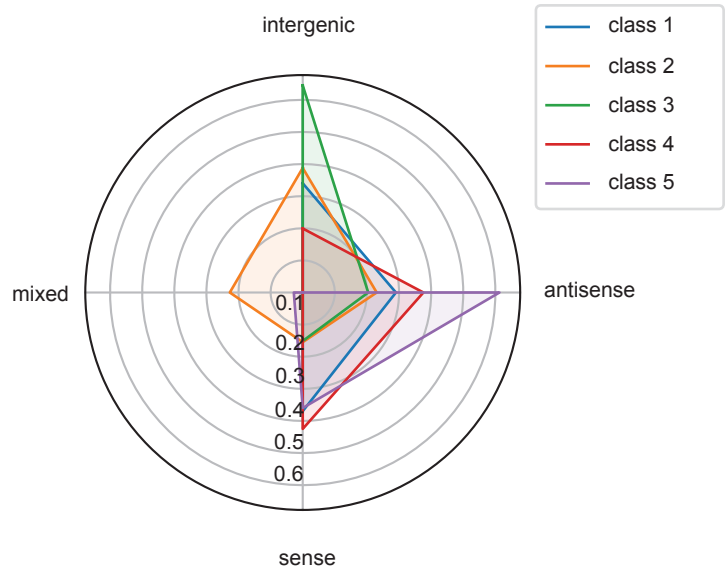**B**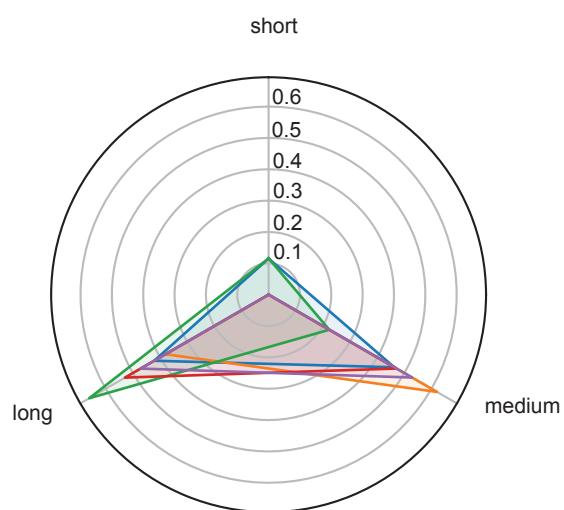**C**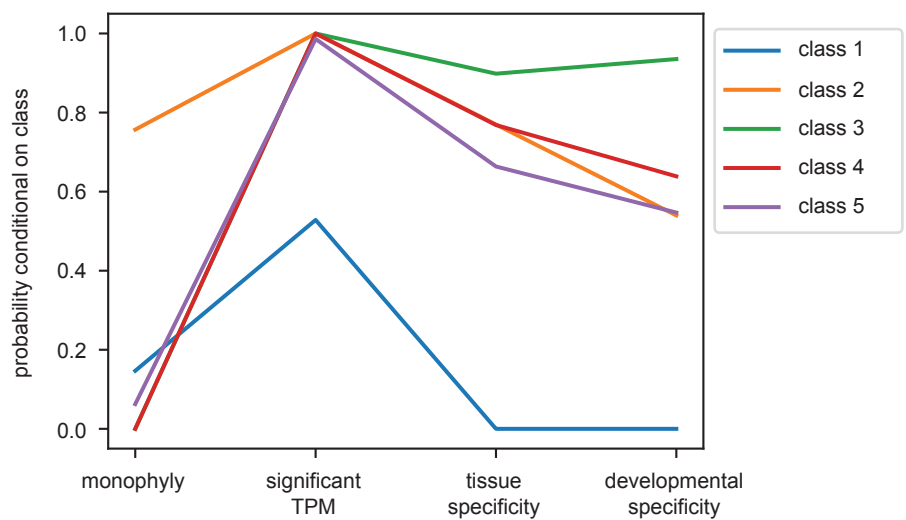**D**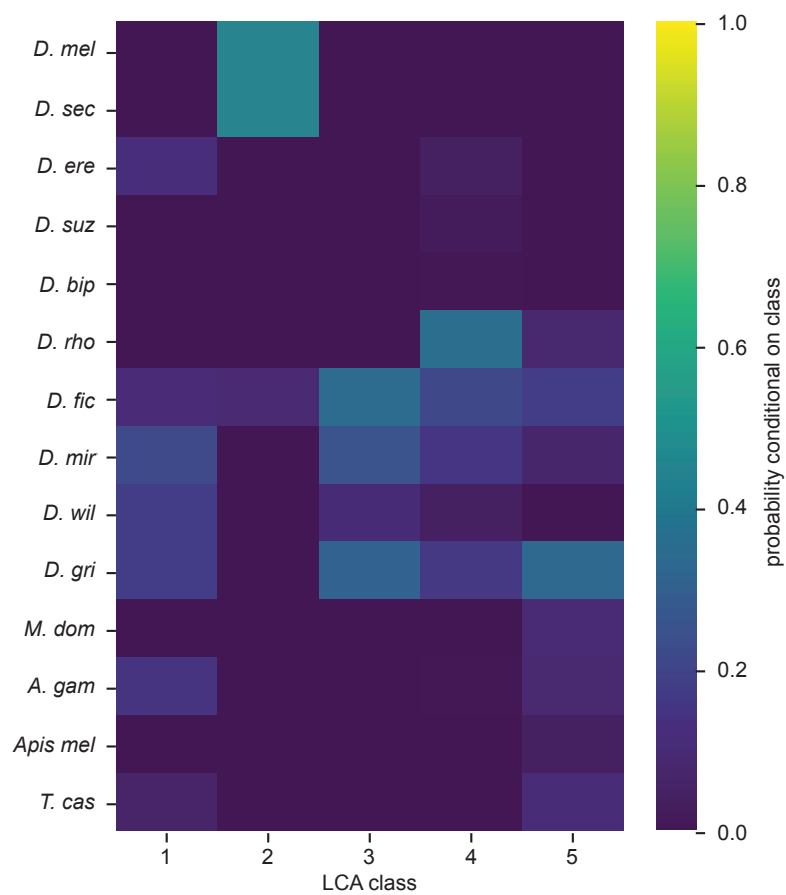**E**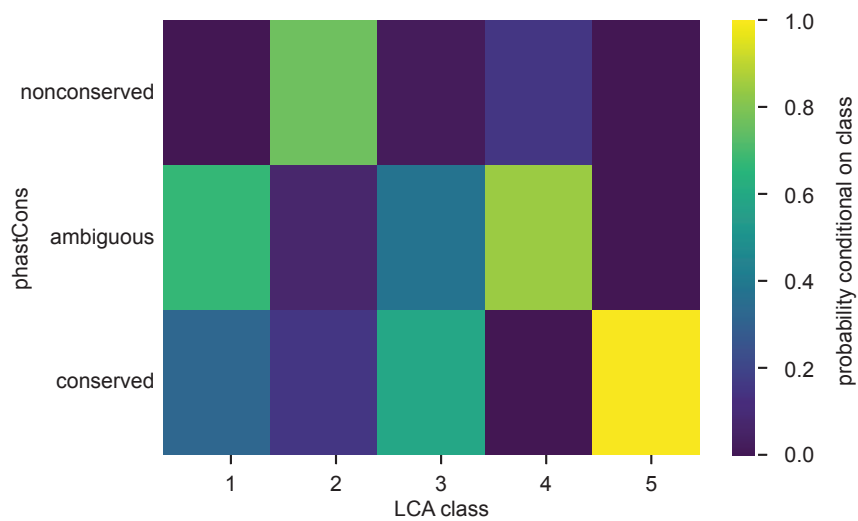

Supplement: supp [file elife-78772-supp-v1.zip]

**A**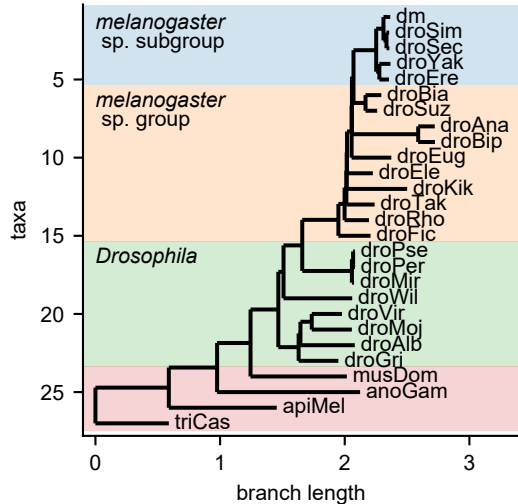**B**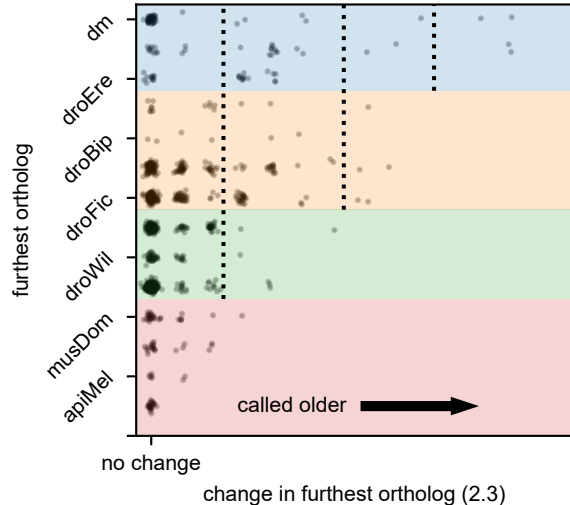**C**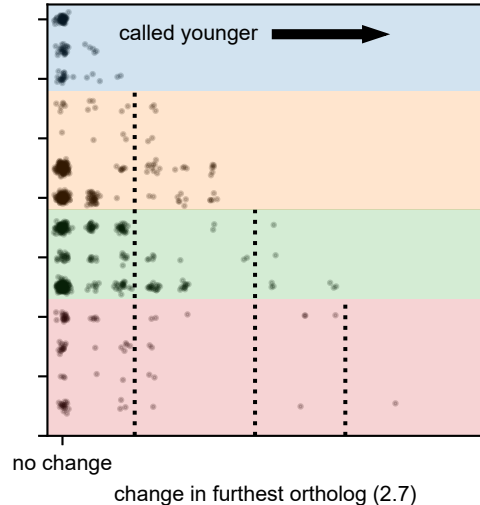

Supplement: supp [file elife-78772-supp-v1.zip]

**A**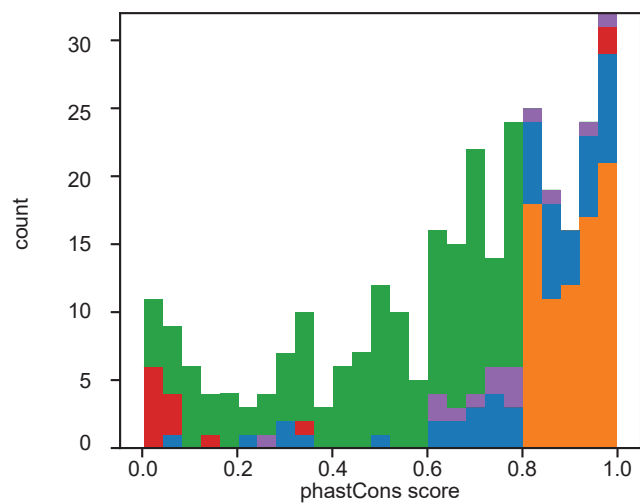**B**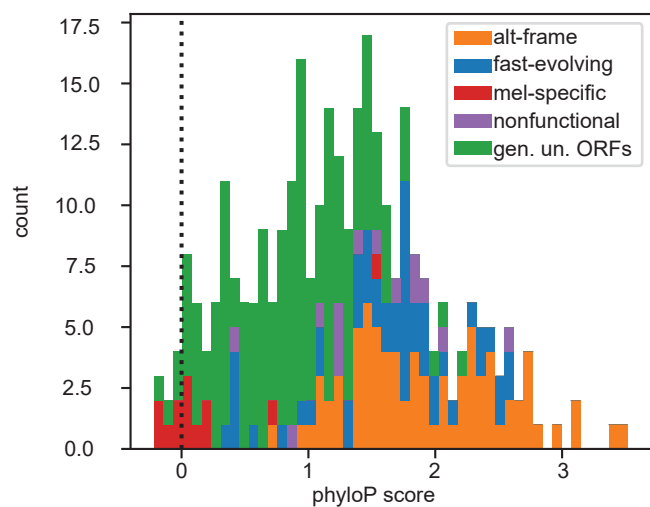**C**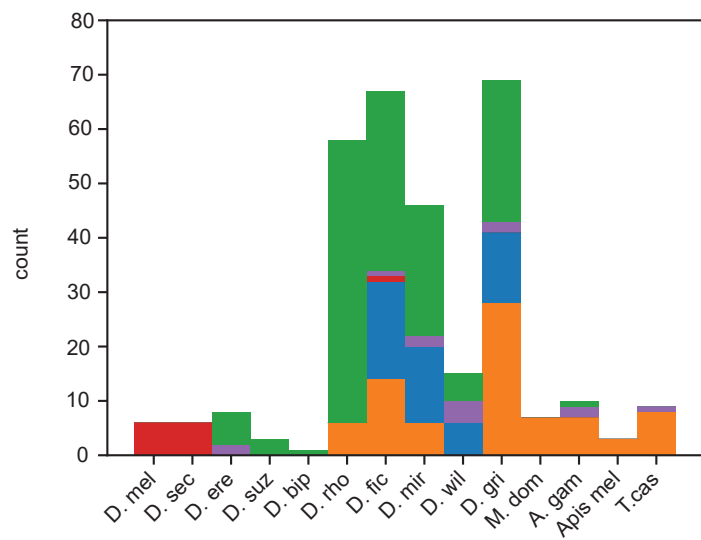**D**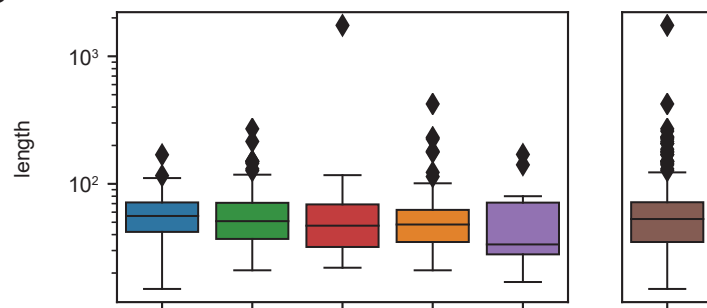**E**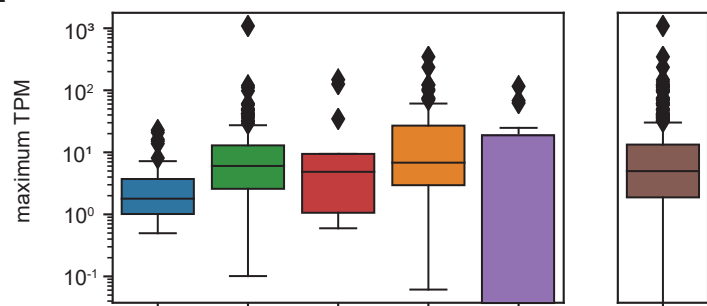**F**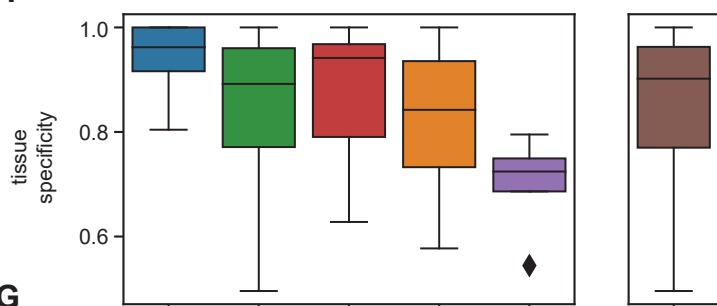**G**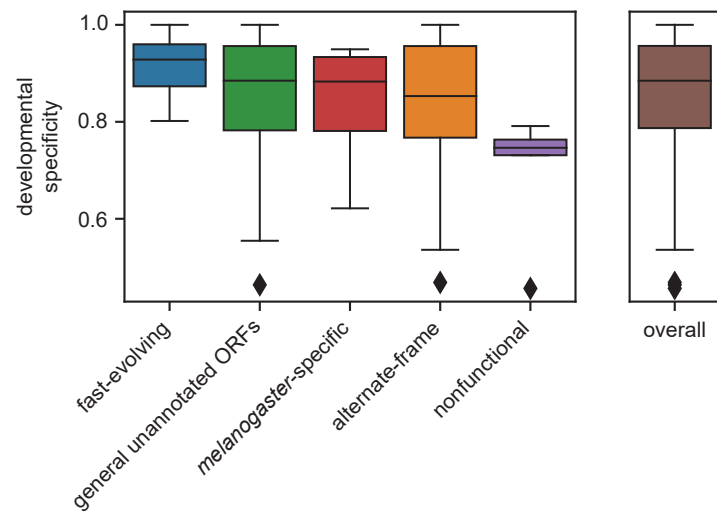

Supplement: supp [file elife-78772-supp-v1.zip]

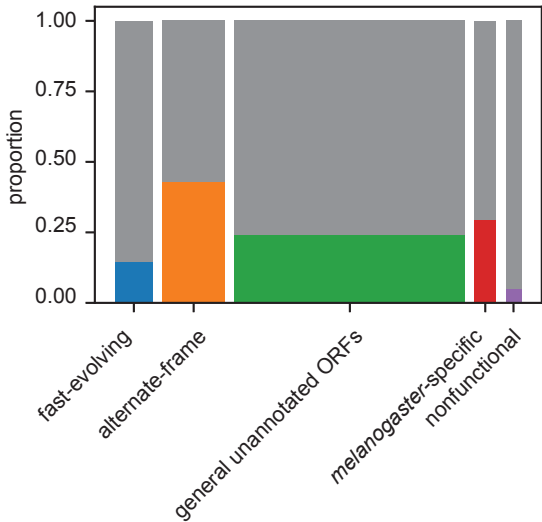

Supplement: supp [file elife-78772-supp-v1.zip]

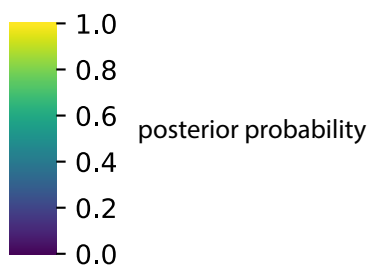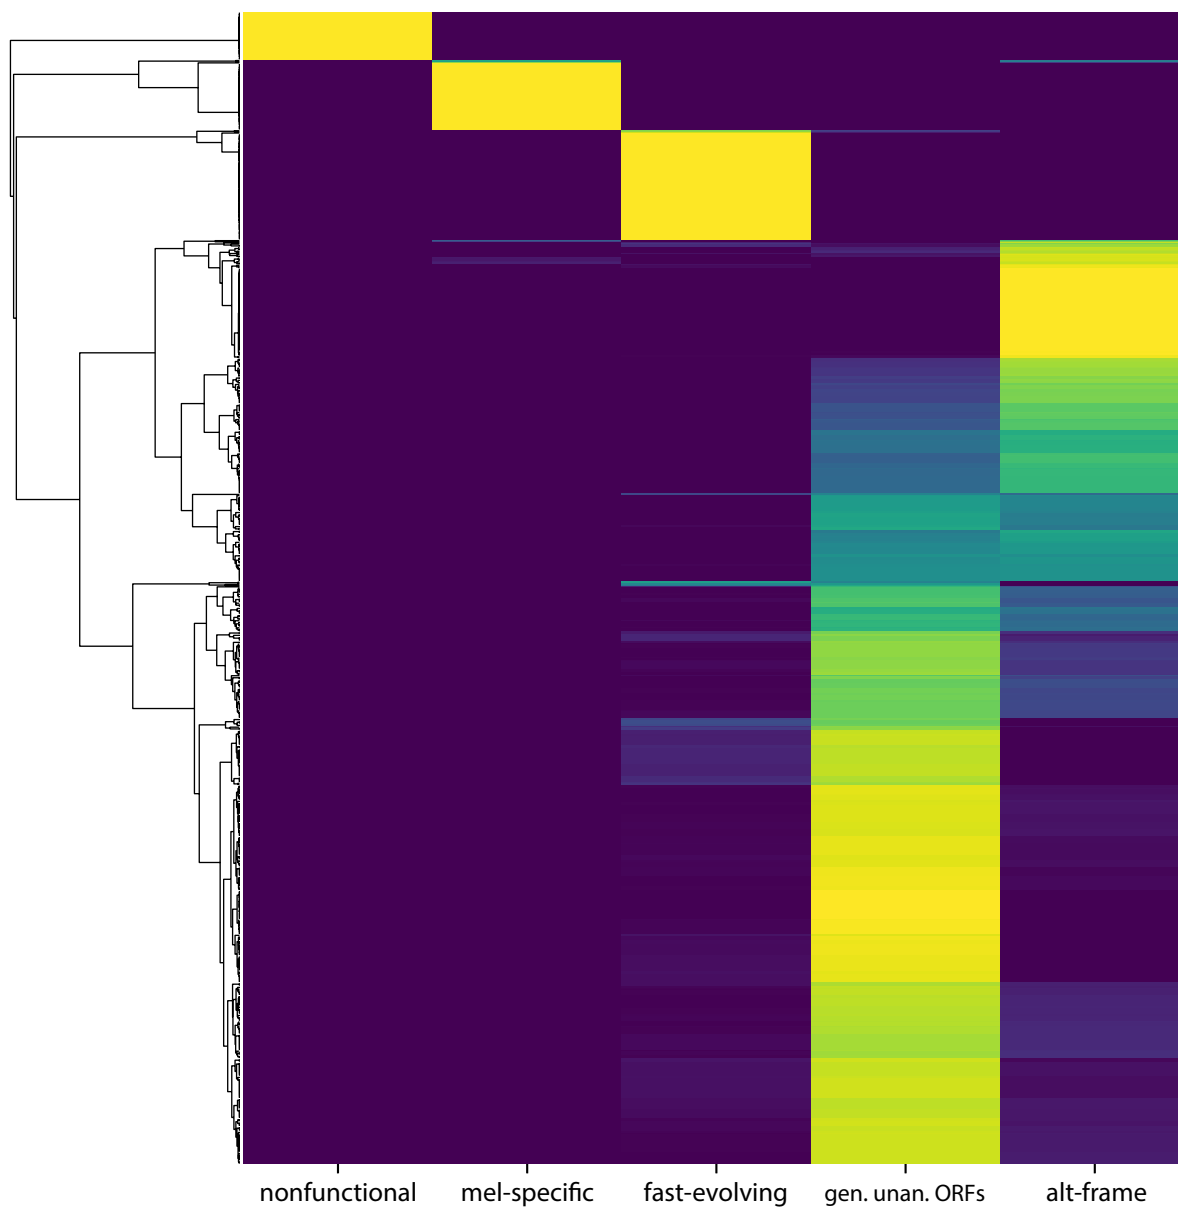

Supplement: supp [file elife-78772-supp-v1.zip]

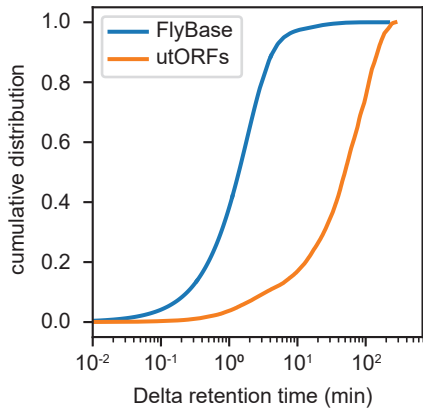

Supplement: supp [file elife-78772-supp-v1.zip]
